# Supplementary material for: Onchocerciasis transmission in Ghana: biting and parous rates of host-seeking sibling species of the Simulium damnosum complex
Source: PubMed Central journal article supplement (PMC4247625; doi:10.1186/s13071-014-0511-9), 2014-11-21
Supplement: 13071_2014_511_MOESM1_ESM.pdf [file 13071_2014_511_MOESM1_ESM.pdf]

Additional file 1: Summary of host-seeking blackflies caught, by locality, season, trapping technique and species

| Region                         | Village                 | Season                  | Humidity<br>(Mean<br>(Range)) | Temp<br>(Mean<br>(Range)) | Trapping<br>Method | Hours  | Total | Total<br><i>S. damnosum</i> s.l. | <i>S. damnosum</i> s.s.<br>/ <i>S. sirbanum</i> | <i>S. soubrense</i><br>Beffa form | <i>S. squamosum</i> <sup>a,b</sup> | <i>S. yahense</i> | <i>S. sanctipauli</i> | Non-<br>damnosum | Unidentified <sup>c</sup> |         |
|--------------------------------|-------------------------|-------------------------|-------------------------------|---------------------------|--------------------|--------|-------|----------------------------------|-------------------------------------------------|-----------------------------------|------------------------------------|-------------------|-----------------------|------------------|---------------------------|---------|
| Brong-Ahafo                    | Asubende                | Dry<br>February<br>2011 | 35.7%<br>(13-81)              | 32.6 °C<br>(21.8-37.0)    | V/C                | 62hrs  | 382   | 382                              | 382                                             | -                                 | -                                  | -                 | -                     | 0                | -                         |         |
|                                |                         |                         |                               |                           | Human-Tent         | 59hrs  | 70    | 35                               | 35                                              | -                                 | -                                  | -                 | 35                    | -                |                           |         |
|                                |                         |                         |                               |                           | Cow-Tent           | 59hrs  | 112   | 42                               | 42                                              | -                                 | -                                  | -                 | 70                    | -                |                           |         |
|                                | Agborlekame             | Dry<br>February<br>2010 | 46.9%<br>(32-66)              | 34.4°C<br>(28.8-40.2)     | V/C                | 22hrs  | 51    | 51                               | 51                                              | -                                 | -                                  | -                 | -                     | -                | -                         | -       |
|                                |                         |                         |                               |                           | Human-Tent         | 21hrs  | 2     | 2                                | 2                                               | -                                 | -                                  | -                 | -                     | -                |                           |         |
|                                |                         |                         |                               |                           | Cow-Tent           | 14hrs  | 0     | 0                                | 0                                               | -                                 | -                                  | -                 | -                     | -                |                           |         |
| Volta                          | Asukawkaw<br>Ferry      | Wet<br>August<br>2009   | 80.9%<br>(44-99)              | 27.3°C<br>(24.0-34.9)     | V/C                | -      | -     | -                                | -                                               | -                                 | -                                  | -                 | -                     | -                | -                         |         |
|                                |                         |                         |                               |                           | Human -Tent        | 62hrs  | 250   | 250                              | 0                                               | 230                               | 20                                 | -                 | -                     | -                |                           |         |
|                                |                         |                         |                               |                           | Cow-Tent           | 58hrs  | 36    | 36                               | 0                                               | 32                                | 4                                  | -                 | -                     | -                |                           |         |
|                                |                         | Dry<br>March<br>2010    | 66.4%<br>(45-99)              | 30.4°C<br>(23.9-36.1)     | V/C                | 45hrs  | 777   | 777                              | 227                                             | 37                                | 407                                | -                 | -                     | -                | -                         | 44M 62D |
|                                |                         |                         |                               |                           | Human -Tent        | 44hrs  | 139   | 139                              | 16                                              | 18                                | 105                                | -                 | -                     | -                | -                         |         |
|                                |                         |                         |                               |                           | Cow-Tent           | 44hrs  | 125   | 125                              | 5                                               | 26                                | 94                                 | -                 | -                     | -                | -                         |         |
|                                | Dry<br>February<br>2011 | 57.3%<br>(34-99)        | 30.7°C<br>(23.1-36.0)         | V/C                       | 44hrs              | 714    | 714   | 175                              | 28                                              | 412                               | -                                  | -                 | -                     | 0                | 28M 71D                   |         |
|                                |                         |                         |                               | Human -Tent               | 44hrs              | 108    | 100   | 16                               | 3                                               | 74                                | -                                  | -                 | -                     | 8                | 7D                        |         |
|                                |                         |                         |                               | Cow-Tent                  | 43hrs              | 58     | 48    | 10                               | 4                                               | 32                                | -                                  | -                 | -                     | 10               | 2D                        |         |
|                                | Dodi Papase             | Wet<br>August<br>2009   | 93.1%<br>(78-99)              | 25.3°C<br>(22.7-27.7)     | V/C                | -      | -     | -                                | -                                               | -                                 | -                                  | -                 | -                     | -                | -                         | -       |
|                                |                         |                         |                               |                           | Human -Tent        | 49hrs  | 76    | 76                               | 1                                               | 0                                 | 75                                 | -                 | -                     | -                | -                         |         |
|                                |                         |                         |                               |                           | Cow-Tent           | 49hrs  | 47    | 47                               | 1                                               | 1                                 | 45                                 | -                 | -                     | -                | -                         |         |
| Dry<br>March<br>2010           |                         | 59.2%<br>(43-99)        | 32.0°C<br>(25.5-36.0)         | V/C                       | 44hrs              | 310    | 310   | 18                               | 11                                              | 280                               | -                                  | -                 | -                     | -                | 1M                        |         |
|                                |                         |                         |                               | Human-Tent                | 44hrs              | 41     | 41    | 0                                | 2                                               | 39                                | -                                  | -                 | -                     | -                |                           |         |
|                                |                         |                         |                               | Cow-Tent                  | 40hrs              | 14     | 14    | 0                                | 0                                               | 13                                | -                                  | -                 | -                     | -                |                           |         |
| Dry<br>February<br>2011        | 56.7%<br>(35-99)        | 30.3°C<br>(22.3-36.3)   | V/C                           | 31hrs                     | 405                | 405    | 34    | 2                                | 357                                             | -                                 | -                                  | -                 | 0                     | 12D              |                           |         |
|                                |                         |                         | Human -Tent                   | 31hrs                     | 105                | 100    | 5     | 1                                | 84                                              | -                                 | -                                  | -                 | 5                     | 10M              |                           |         |
|                                |                         |                         | Cow-Tent                      | 31hrs                     | 36                 | 35     | 4     | 0                                | 30                                              | 1                                 | -                                  | -                 | 1                     | -                |                           |         |
| Pillar 83<br>/Djodji           | Wet<br>July<br>2009     | 75.7%<br>(41-98)        | 28.3°C<br>(23.9-38.2)         | V/C                       | -                  | -      | -     | -                                | -                                               | -                                 | -                                  | -                 | -                     | -                | -                         |         |
|                                |                         |                         |                               | Human -Tent               | 44hrs              | 2      | 2     | -                                | -                                               | 1                                 | -                                  | -                 | -                     | 1                | 1D                        |         |
|                                |                         |                         |                               | Cow-Tent                  | 44hrs              | 12     | 12    | -                                | -                                               | 10                                | -                                  | -                 | -                     | -                | 2D                        |         |
|                                | Dry<br>March<br>2010    | 67.0%<br>(37-99)        | 29.6°C<br>(23.9-39.9)         | V/C                       | 44hrs              | 943    | 943   | 26                               | -                                               | 549                               | -                                  | -                 | -                     | -                | 9M, 359NA                 |         |
|                                |                         |                         |                               | Human -Tent               | 44hrs              | 66     | 65    | 0                                | 0                                               | 62                                | -                                  | -                 | -                     | 1                | 3D                        |         |
|                                |                         |                         |                               | Cow-Tent                  | 44hrs              | 77     | 77    | 0                                | 1                                               | 75                                | -                                  | -                 | -                     | -                | 1D                        |         |
| Dry<br>February<br>2011        | 50.8%<br>(12-97)        | 32.6°C<br>(22.0-38.8)   | V/C                           | 42hrs                     | 1171               | 1171   | 12    | 2                                | 910                                             | 2                                 | -                                  | -                 | 0                     | 3M 242NA         |                           |         |
|                                |                         |                         | Human -Tent                   | 42hrs                     | 374                | 345    | 20    | 0                                | 325                                             | -                                 | -                                  | -                 | 29                    | -                |                           |         |
|                                |                         |                         | Cow-Tent                      | 41hrs                     | 200                | 159    | 18    | 0                                | 136                                             | -                                 | -                                  | -                 | 41                    | 5D               |                           |         |
| Western Bosomase <sup>d</sup>  | Wet<br>August<br>2009   | 78.0%<br>(49-99)        | 27.1°C<br>(23.7-33.3)         | V/C                       | 42hrs              | 688    | 688   | -                                | -                                               | -                                 | -                                  | -                 | 688                   | -                | -                         |         |
|                                |                         |                         |                               | Human -Tent               | 46hrs              | 199    | 199   | -                                | -                                               | 1                                 | -                                  | -                 | -                     | 198              | -                         | -       |
|                                |                         |                         |                               | Cow-Tent                  | 45hrs              | 217    | 217   | -                                | -                                               | -                                 | -                                  | -                 | -                     | 211              | -                         | 6D      |
|                                | Dry<br>February<br>2010 | 67.7%<br>(39-85)        | 32.5°C<br>(27.5-39.6)         | V/C                       | 44hrs              | 159    | 159   | -                                | -                                               | -                                 | 49                                 | 105               | -                     | -                | 5D                        |         |
|                                |                         |                         |                               | Human -Tent               | 44hrs              | 134    | 134   | -                                | -                                               | -                                 | 83                                 | 50                | -                     | -                | 1D                        |         |
|                                |                         |                         |                               | Cow-Tent                  | 38hrs              | 83     | 83    | -                                | -                                               | -                                 | 61                                 | 21                | -                     | -                | 1D                        |         |
| Ashanti Gyankobaa <sup>e</sup> | Wet<br>August<br>2009   | 69.1%<br>(50-89)        | 28.0°C<br>(24.5-32.7)         | V/C                       | 44hrs              | 542    | 542   | 35                               | -                                               | 63                                | 0                                  | 439               | -                     | 5D               |                           |         |
|                                |                         |                         |                               | Human -Tent               | 43hrs              | 641    | 631   | 4                                | -                                               | 1                                 | 13                                 | 572               | 10                    | 41D              |                           |         |
|                                |                         |                         |                               | Cow-Tent                  | 42hrs              | 550    | 548   | 13                               | -                                               | 0                                 | 5                                  | 456               | 2                     | 74D              |                           |         |
| Totals                         |                         |                         |                               |                           | V/C                | 464hrs | 6142  | 6142                             | 960                                             | 80                                | 2978                               | 51                | 1232                  | 0                | 841                       |         |
|                                |                         |                         |                               |                           | Human-Tent         | 617hrs | 2207  | 2119                             | 99                                              | 254                               | 787                                | 96                | 820                   | 88               | 63                        |         |
|                                |                         |                         |                               |                           | Cow-Tent           | 592hrs | 1567  | 1443                             | 93                                              | 64                                | 439                                | 67                | 688                   | 124              | 92                        |         |

<sup>a</sup>All *S. squamosum* from the Volta region were type C.

<sup>b</sup>All *S. squamosum* from Gyankobaa were type E. The single *S. squamosum* found in Bosomase was not identified to cytoform.

<sup>c</sup>The unidentified *S. damnosum* s.l. flies were so classified either because they were too desiccated for successful morphological identification (D) or the molecular results could not successfully identify a specific species (M). In addition, a subsection of V/C caught flies from two samples were not identified to species as they were donated to another study (NA).

<sup>d</sup>In Bosomase in 2011, due to low fly intensities only two V/C *S. sanctipauli* flies were caught over one day, no further sampling was performed.

<sup>e</sup>In Gyankobaa in the dry season in 2010 due to low fly intensities, no V/C or Human-Tent caught flies were caught and only two *S. damnosum* s.s. /*S. sirbanum* were caught in the Cow-Tent over 7 hours, no further sampling was performed.
