# Supplementary material for: Onchocerciasis transmission in Ghana: biting and parous rates of host-seeking sibling species of the Simulium damnosum complex
Source: Springer Nature journal article supplement (doi:10.1186/s13071-014-0511-9), 2014-11-21
Supplement: MOESM2 [file 13071_2014_511_MOESM2_ESM.pdf]

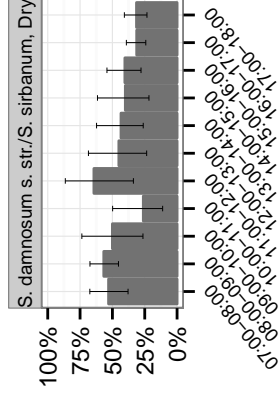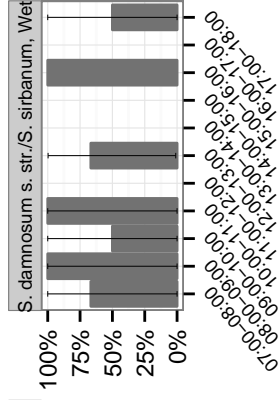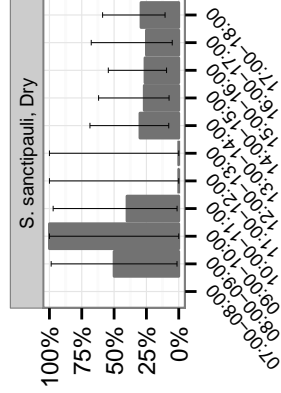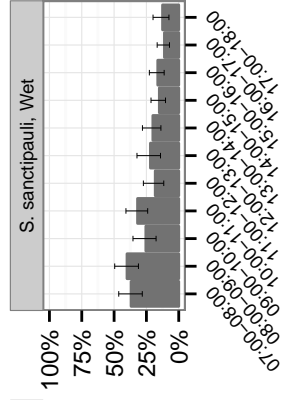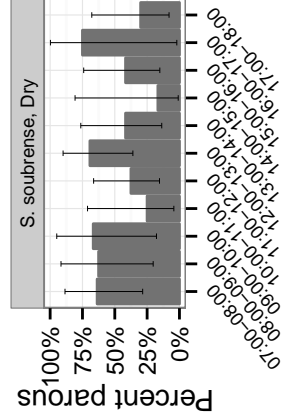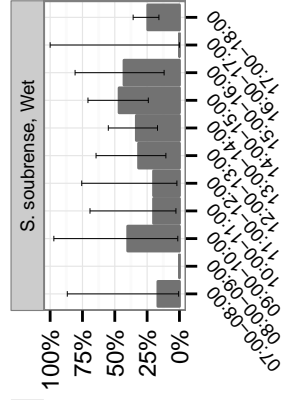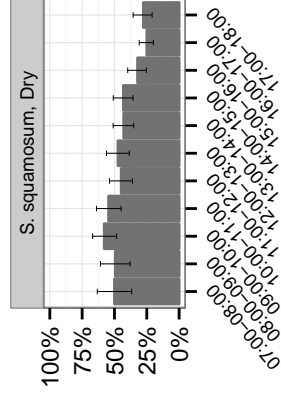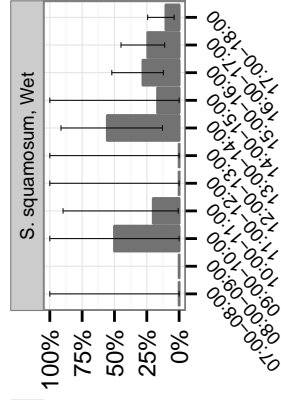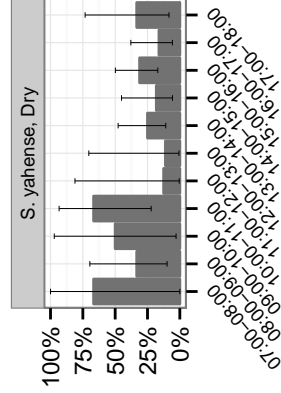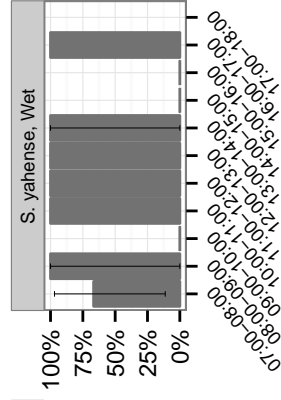

Time
